# Supplementary material for: Osteosarcoma cell–derived CCL2 facilitates lung metastasis via accumulation of tumor-associated macrophages
Source: Springer Nature journal article supplement (doi:10.1007/s00262-025-04051-x), 2025-05-09
Supplement: MOESM1 [file 262_2025_4051_MOESM1_ESM.pdf]

## **Supplementary Information**

### **Osteosarcoma cell-derived CCL2 facilitates lung metastasis via accumulation of tumor-associated macrophages**

Hiroya Kondo<sup>1</sup>, Hiroshi Tazawa<sup>2,3</sup>, Tomohiro Fujiwara<sup>1,4</sup>, Aki Yoshida<sup>1</sup>, Miho Kure<sup>1</sup>, Koji Demiya<sup>1</sup>, Nobuhiko Kanaya<sup>2</sup>, Toshiaki Hata<sup>1</sup>, Koji Uotani<sup>1</sup>, Joe Hasei<sup>1</sup>, Toshiyuki Kunisada<sup>1,5</sup>, Shunsuke Kagawa<sup>2</sup>, Yusuke Yoshioka<sup>6</sup>, Toshifumi Ozaki<sup>1</sup>, Toshiyoshi Fujiwara<sup>2</sup>

Departments of <sup>1</sup>Orthopaedic Surgery, <sup>2</sup>Gastroenterological Surgery, <sup>4</sup>Sports Medicine, and <sup>5</sup>Medical Materials for Musculoskeletal Reconstruction, Okayama University Graduate School of Medicine, Dentistry and Pharmaceutical Sciences, Okayama 700-8558, Japan; <sup>3</sup>Center for Innovative Clinical Medicine, Okayama University Hospital, Okayama 700-8558, Japan. <sup>7</sup>Department of Molecular and Cellular Medicine, Tokyo Medical University, Tokyo 160-0023, Japan.

#### **Supplementary Figure S1**

Tumor growth curves and tumor weights in orthotopic tumor models with non-metastatic and metastatic OS cells.

#### **Supplementary Figure S2**

Gating strategy for M1-like and M2-like macrophages in FACS analysis.

#### **Supplementary Figure S3**

Proportion of M1-like and M2-like macrophages in primary tumors and spleens of mice bearing non-metastatic and metastatic OS tumors.

#### **Supplementary Figure S4**

Immunohistochemistry analysis of CCL2 and EV surface markers (CD8, CD81) using mouse and human OS cells.

#### **Supplementary Figure S5**

Gating strategy for macrophages containing fluorescence-labeled EVs in FACS analysis.

#### **Supplementary Figure S6**

Tumor growth curves, tumor weights, and body weights in orthotopic tumor models with metastatic OS cells after treatment with CCL2-neutralizing antibody.

#### **Supplementary Figure S7**

Proportion of M1 and M2 macrophages in primary tumors and spleens of mice bearing metastatic OS tumors after treatment with CCL2-neutralizing antibody.

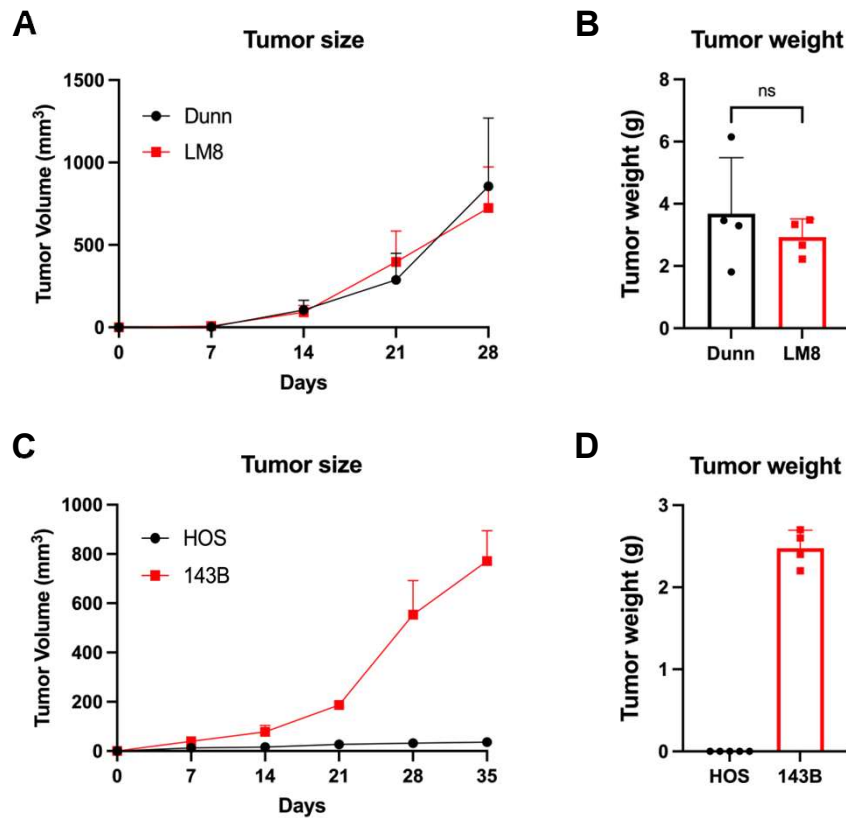

**Supplementary Figure S1. Tumor growth curves and tumor weights in orthotopic tumor models with non-metastatic and metastatic OS cells.** **A** Murine OS cells with different metastatic abilities (non-metastatic Dunn and metastatic LM8) ( $2 \times 10^6$  cells) were inoculated orthotopically into the tibia of C3H/He mice. Tumor volumes were monitored once a week until 28 days after tumor inoculation. **B** Mean weights of Dunn and LM8 tumors on day 28. **C** Human OS cells with different metastatic abilities (non-metastatic HOS and metastatic 143B) ( $2 \times 10^6$  cells) were inoculated orthotopically into the tibia of nude mice. Tumor volumes were monitored once a week until 35 days after tumor inoculation. **D** Mean weights of HOS and 143B tumors on day 35. Data are expressed as mean  $\pm$  SD ( $n = 4$  in each group; ns, not significant).

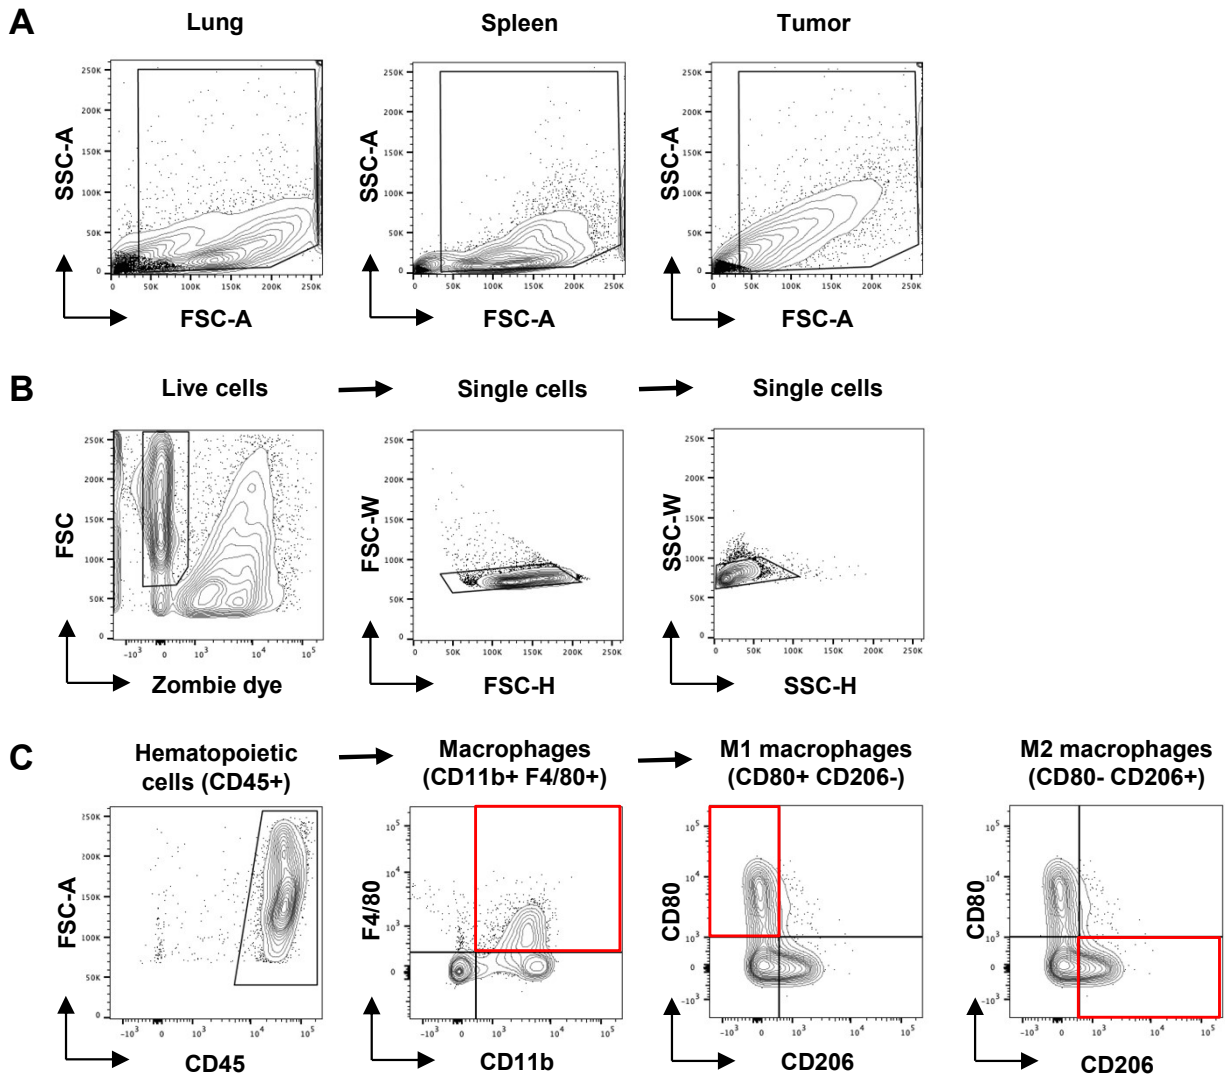

**Supplementary Figure S2. Gating strategy for M1-like and M2-like macrophages in FACS analysis.** **A** Representative FSC and SSC plots with gating for live cells. **B** Representative FSC, SSC, and zombie dye plots with gating for single live cells. **C** Representative FSC, CD45, CD11b, F4/80, CD206, and CD80 plots with gating for hematopoietic cells, macrophages, M1-like macrophages, and M2-like macrophages.

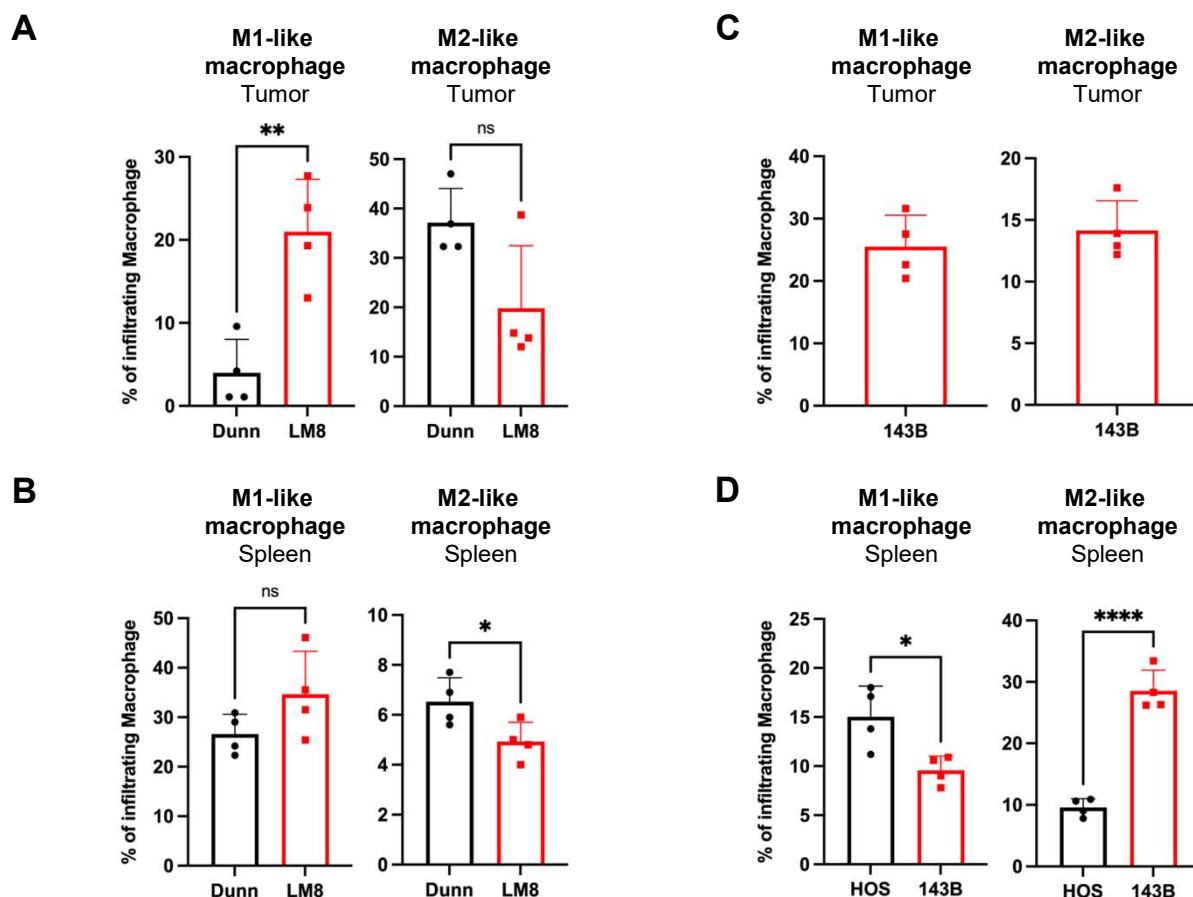

**Supplementary Figure S3. Proportions of M1-like and M2-like macrophages in primary tumors and spleens of mice bearing non-metastatic and metastatic OS tumors.** **A, B** The proportions of M1 and M2 macrophages in primary tumors (A) and spleens (B) of mice orthotopically inoculated with Dunn and LM8 cells. **C, D**, The proportions of M1 and M2 macrophages in primary tumors (C) and spleens (D) of mice orthotopically inoculated with HOS and 143B cells. Data are expressed as mean  $\pm$  SD ( $n = 4$  in each group; \*,  $P < 0.05$ ; \*\*,  $P < 0.01$ ; \*\*\*\*,  $P < 0.0001$ ; ns, not significant).

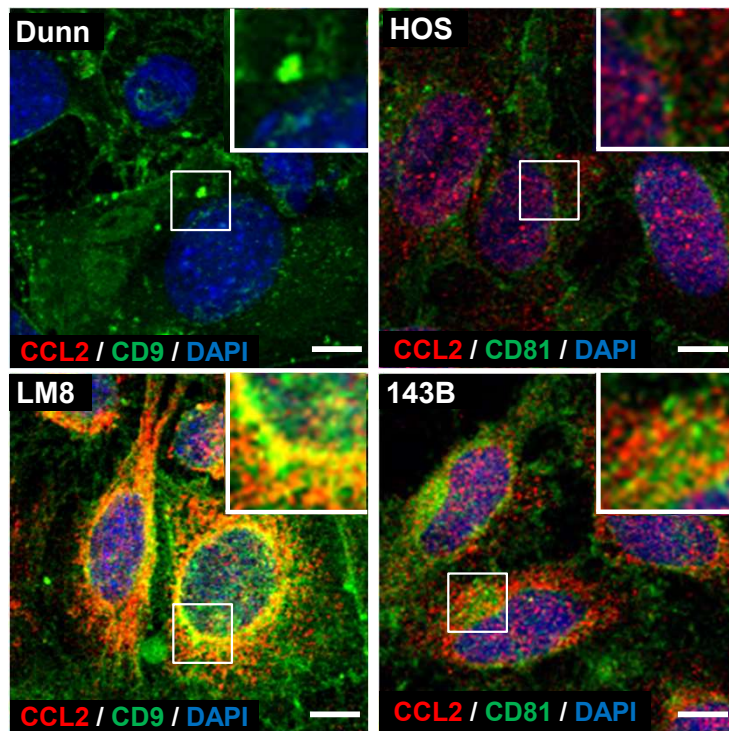

**Supplementary Figure S4. Immunocytochemistry analysis of CCL2 and EV surface markers (CD8, CD81) using mouse and human OS cells. Scale bars, 10 μm.**

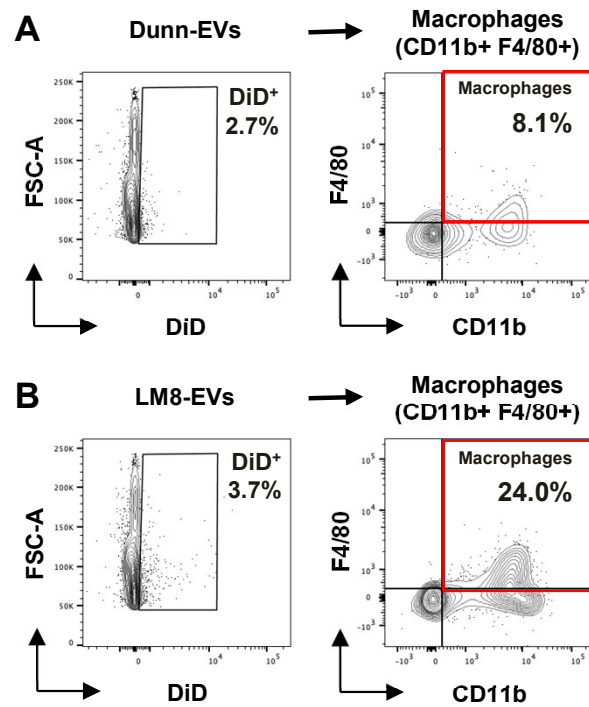

**Supplementary Figure S5. Gating strategy for macrophages containing fluorescence-labeled EVs in FACS analysis.** **A, B** The extracellular vesicles (EVs) were collected from the conditioned medium of nonmetastatic Dunn cells (**A**) and metastatic LM8 cells (**B**) and labeled using Vybrant DiD Cell-Labeling Solution. The fluorescence-labeled EVs were intravenously injected and tissues were harvested for FACS analysis. Representative FSC, SSC, CD11b, and F4/80 plots with gating for macrophages containing DiD<sup>+</sup> EVs.

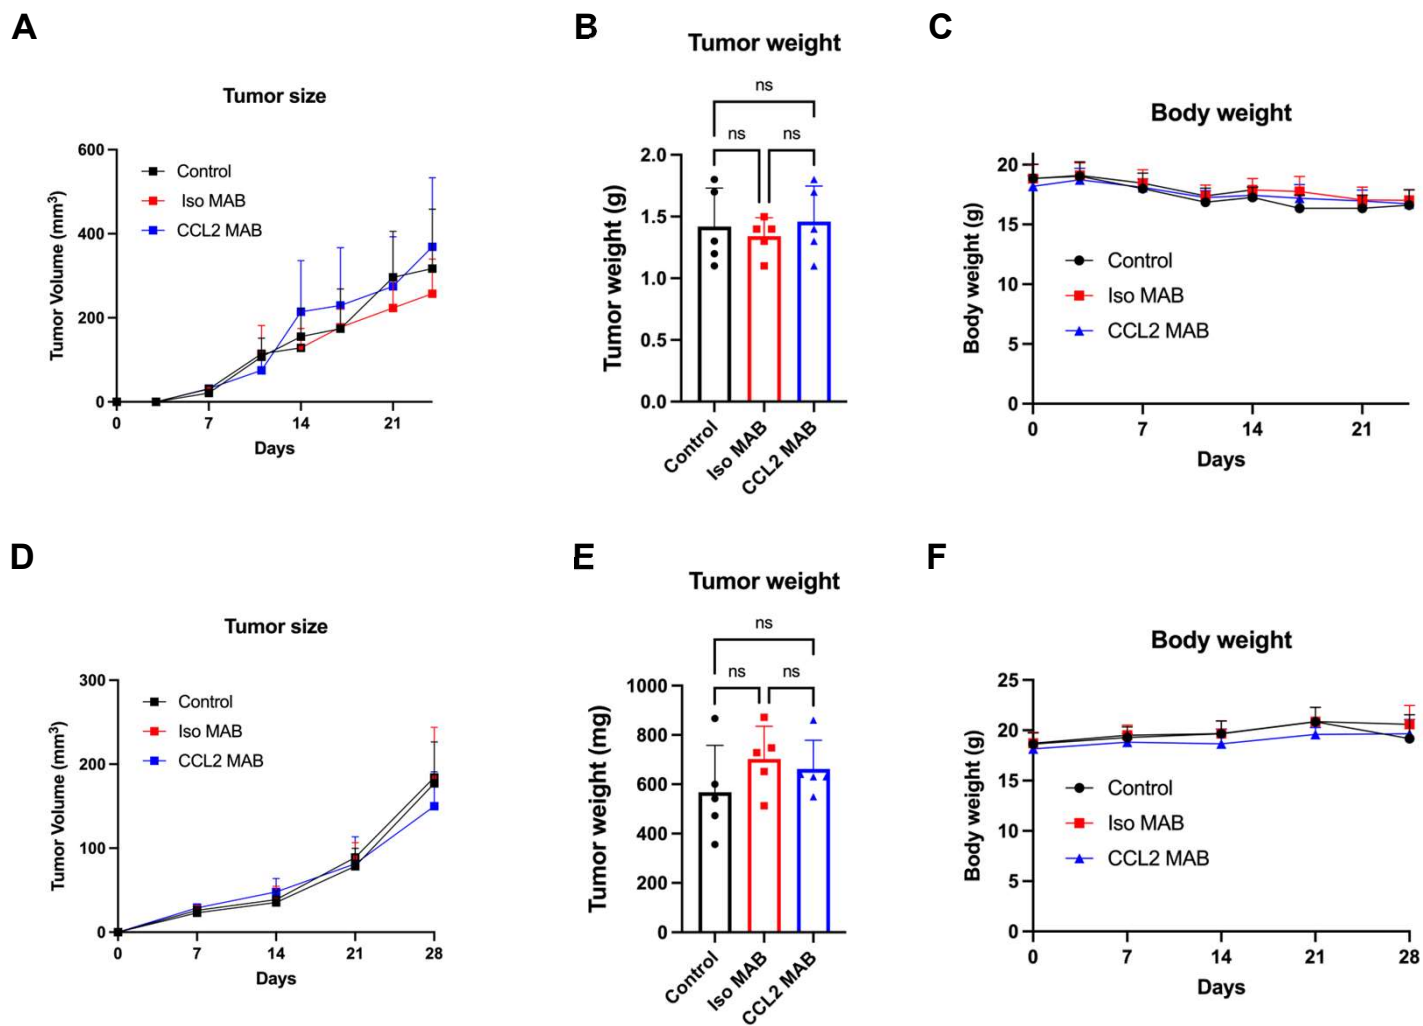

**Supplementary Figure S6. Tumor growth curves, tumor weights, and body weights in orthotopic tumor models with metastatic OS cells after treatment with CCL2-neutralizing antibody.** Murine LM8 cells or human 143B cells with metastatic abilities ( $2 \times 10^6$  cells) were inoculated orthotopically into the tibia of C3H/He mice or nude mice, respectively. Anti-mouse/human CCL2 antibody (CCL2 MAB) or isotype control IgG (Iso MAB) were injected intraperitoneally into the tumor-bearing mice. **A**, Growth curves of LM8 tumors. **B**, Mean weights of LM8 tumors on day 24. **C**, Mean body weights of LM8 tumor-bearing mice. **D**, Growth curves of 143B tumors. **E**, Mean weights of 143B tumors on day 28. **F**, Mean body weights of 143B tumor-bearing mice. Data are expressed as mean  $\pm$  SD ( $n = 5$  in each group; ns, not significant).

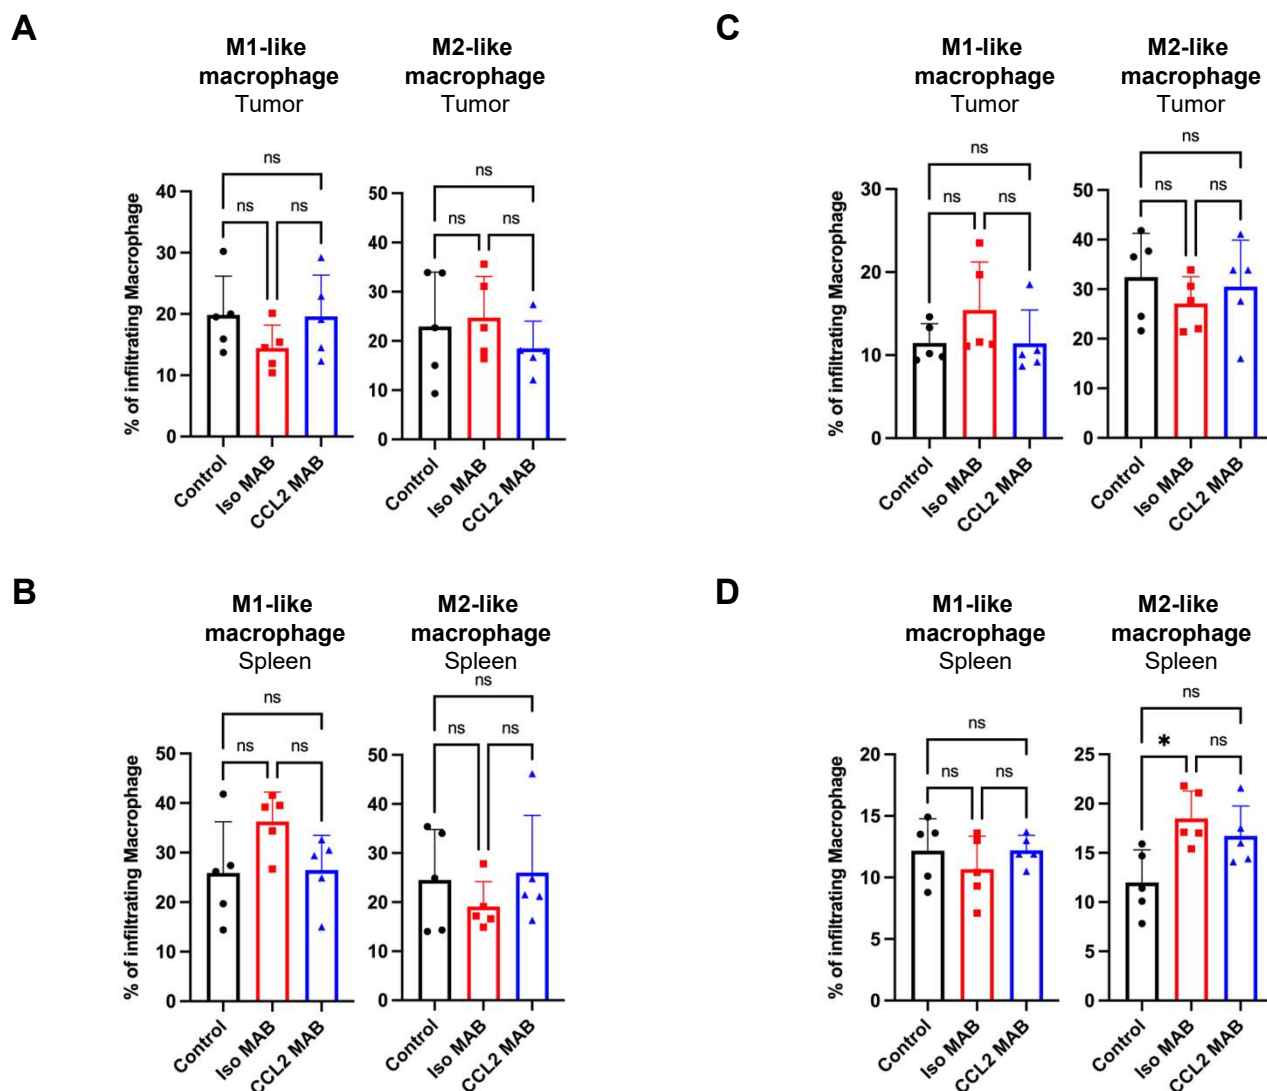

**Supplementary Figure S7. Proportion of M1-like and M2-like macrophages in primary tumors and spleens of mice bearing metastatic OS tumors after treatment with CCL2-neutralizing antibody.** LM8 cells or human 143B cells with metastatic abilities ( $2 \times 10^6$  cells) were inoculated orthotopically into the tibia of C3H/He mice or nude mice, respectively. Anti-mouse/human CCL2 antibody (CCL2 MAB) or isotype control IgG (Iso MAB) were injected intraperitoneally into the tumor-bearing mice. **A,B**, The proportions of M1 and M2 macrophages in primary tumors (A) and spleens (B) of mice orthotopically inoculated with LM8 cells. **C,D**, The proportions of M1 and M2 macrophages in primary tumors (C) and spleens (D) of mice orthotopically inoculated with 143B cells. Data are expressed as mean  $\pm$  SD ( $n = 5$  in each group; \*,  $P < 0.05$ ; ns, not significant).
